# Supplementary material for: Super high-performance 7-atomic-layer thermoelectric material ZrGe2N4
Source: Royal Society of Chemistry journal article supplement (doi:10.1039/d2nr01848a), 2022-01-01
Supplement: d2nr01848a1.pdf [file d2nr01848a1.pdf]

**Supporting Information for**  
**Super high-performance 7-atomic-layer thermoelectric materials ZrGe<sub>2</sub>N<sub>4</sub>**

Wei Liu, Yue Xie<sup>\*</sup>, Jiaren Yuan and Yuanping Chen<sup>†</sup>

*School of Physics and Electronic Engineering, Jiangsu University, Zhenjiang, 212013, Jiangsu, China*

---

<sup>\*†</sup> Corresponding author: [Yueex@ujs.edu.cn](mailto:Yueex@ujs.edu.cn); [Chenyp@ujs.edu.cn](mailto:Chenyp@ujs.edu.cn).

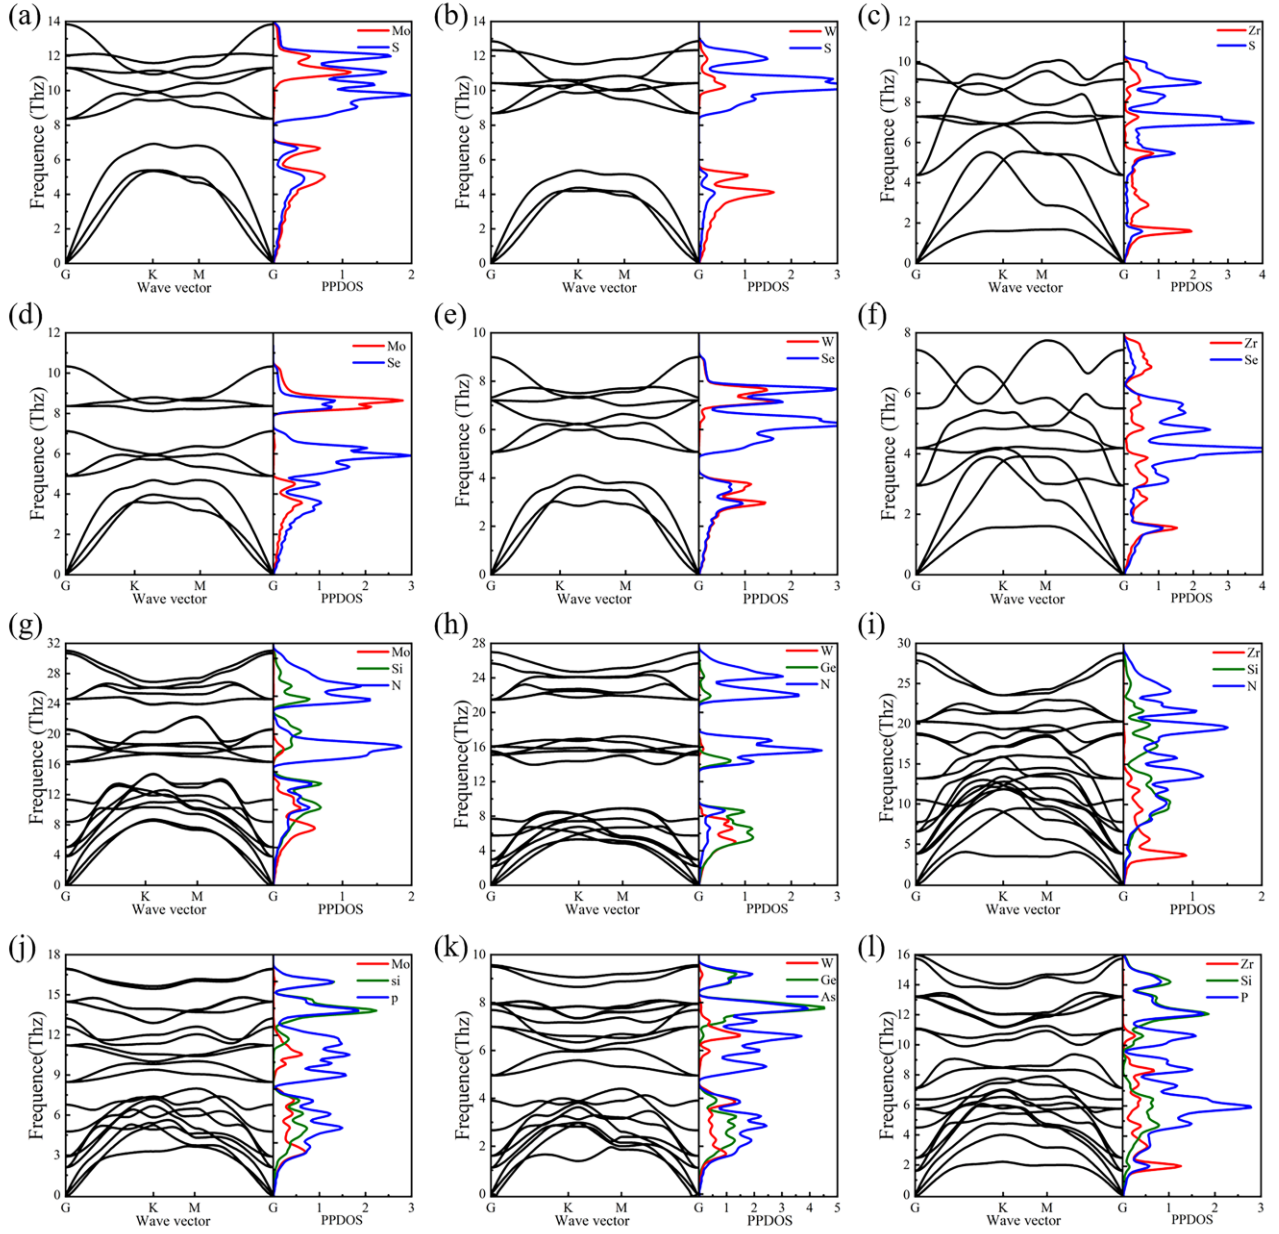

**Figure S1.** Phonon spectra and phonon projection density of states (PPDOS) of (a) 3-atomic-layer  $\text{MoS}_2$ , (b) 3-atomic-layer  $\text{WS}_2$ , (c) 3-atomic-layer  $\text{ZrS}_2$ , (d) 3-atomic-layer  $\text{MoSe}_2$ , (e) 3-atomic-layer  $\text{WSe}_2$ , (f) 3-atomic-layer  $\text{ZrSe}_2$ , (g) 7-atomic-layer  $\text{MoSi}_2\text{N}_4$ , (h) 7-atomic-layer  $\text{WGe}_2\text{N}_4$ , (i) 7-atomic-layer  $\text{ZrSi}_2\text{N}_4$ , (j) 7-atomic-layer  $\text{MoSi}_2\text{P}_4$ , (k) 7-atomic-layer  $\text{WGe}_2\text{As}_4$  and (l) 7-atomic-layer  $\text{ZrSi}_2\text{P}_4$ .

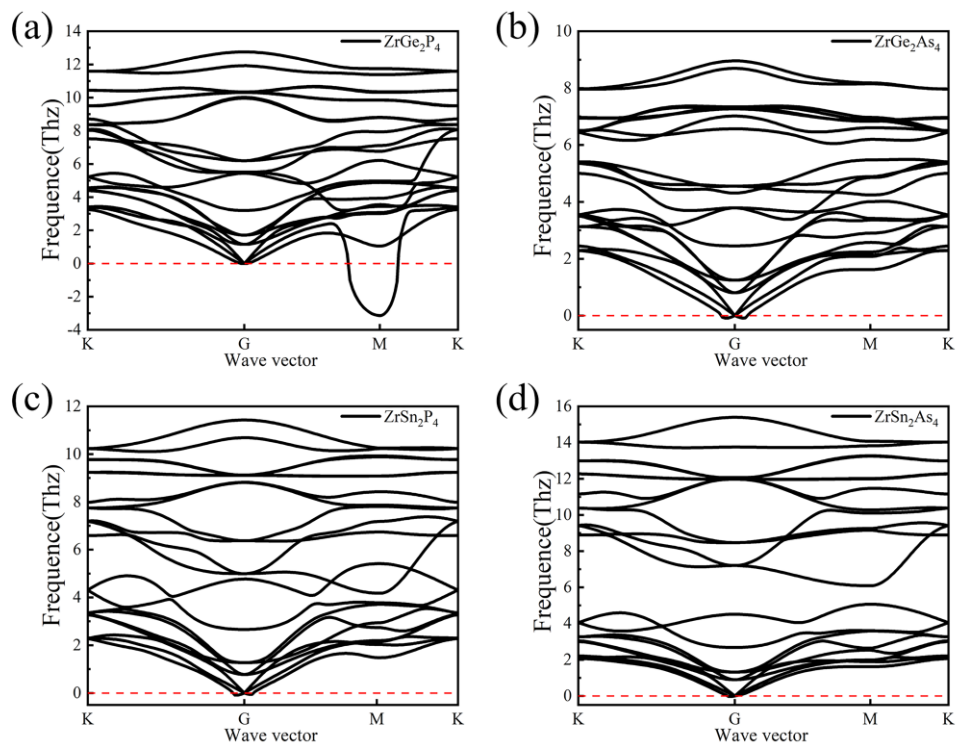

**Figure S2.** Phonon spectra of (a) 7-atomic-layer  $\text{ZrGe}_2\text{P}_4$ , (b) 7-atomic-layer  $\text{ZrGe}_2\text{As}_4$ , (c) 7-atomic-layer  $\text{ZrSn}_2\text{P}_4$ , (d) 7-atomic-layer  $\text{ZrSn}_2\text{As}_4$ .

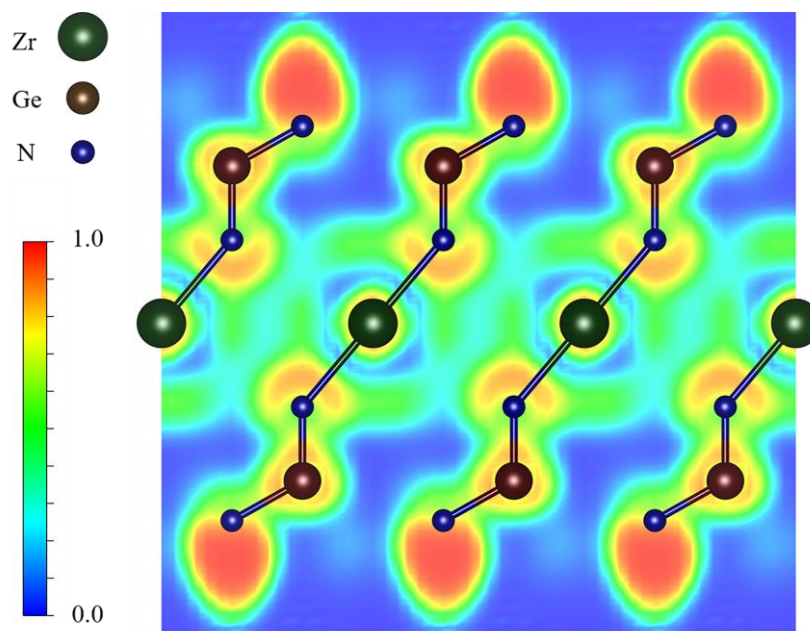

**Figure S3.** 2D view of the electron localization function (ELF) of  $\text{ZrGe}_2\text{N}_4$ , 1 and 0 correspond to the areas with perfectly localized and vanished electron density, respectively

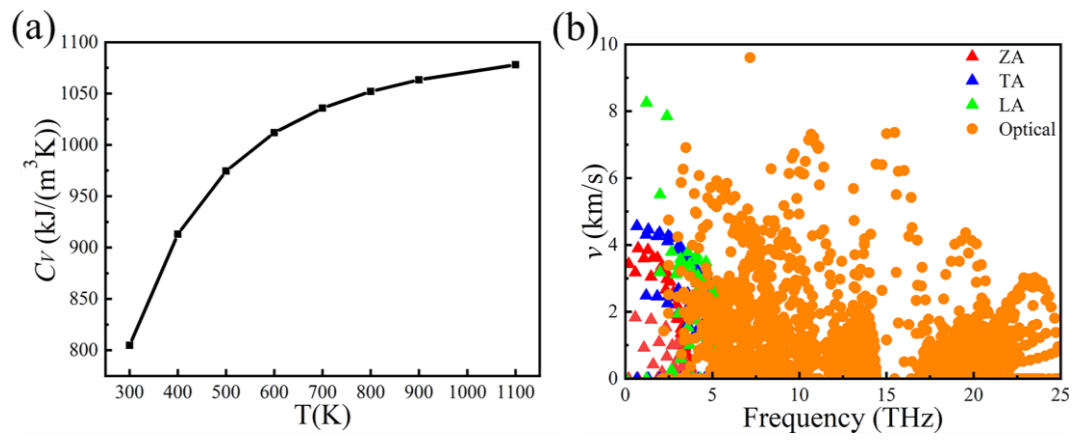

**Figure S4.** (a) Specific heat capacity ( $C_V$ ) of 7-atomic-layer  $\text{ZrGe}_2\text{N}_4$ . (b) Phonon group velocity ( $v$ ) of 7-atomic-layer  $\text{ZrGe}_2\text{N}_4$

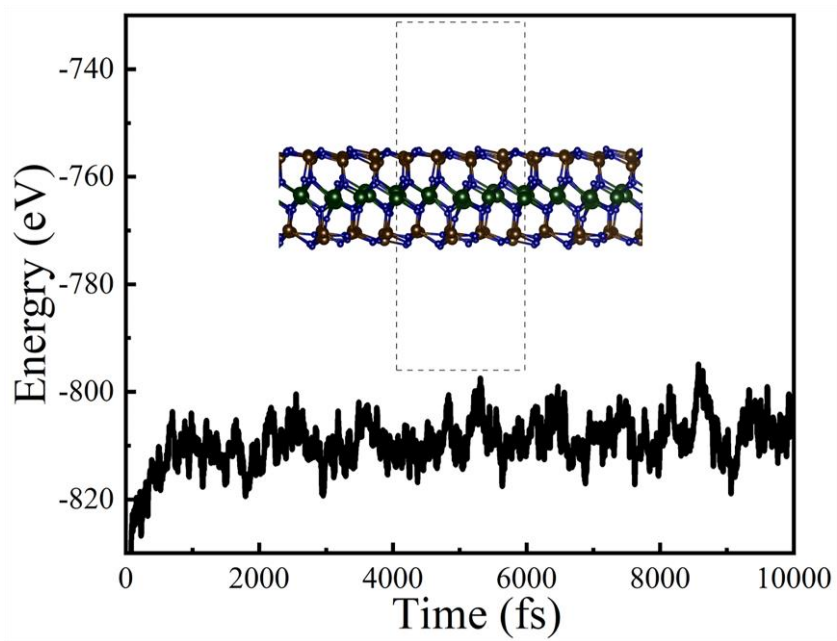

**Figure S5.** Time-dependent energy of 7-atomic-layer  $\text{ZrGe}_2\text{N}_4$  at 2000 K. Inset: Relaxation structure at 2000 K.
